# Supplementary material
Source: publisher figshare collection journal article supplement (https://acs.figshare.com/ndownloader/files/11211578)
Supplement: Supplementary file 1 [file 11211578]

# Supporting Information

## **Cerberus Nanoparticles: Cotargeting of Mitochondrial DNA and Mitochondrial Topoisomerase I in Breast Cancer Cells**

*Abhik Mallick <sup>ψ</sup>, Meenu Mahesh Kuman <sup>ψ</sup>, Arijit Ghosh <sup>§</sup>, Benu Brata Das <sup>§</sup>, Sudipta Basu <sup>ψ,\*</sup>*

<sup>ψ</sup> Department of Chemistry, Indian Institute of Science Education and Research (IISER)-Pune, Pune, 411021, Maharashtra, India

<sup>§</sup> Department of Biological Chemistry, Indian Association for the Cultivation of Science, 2A and 2B Raja S.C Mullick Road, Kolkata, 700032, India

Corresponding Author

\*Email: [sudipta.basu@iiserpune.ac.in](mailto:sudipta.basu@iiserpune.ac.in)

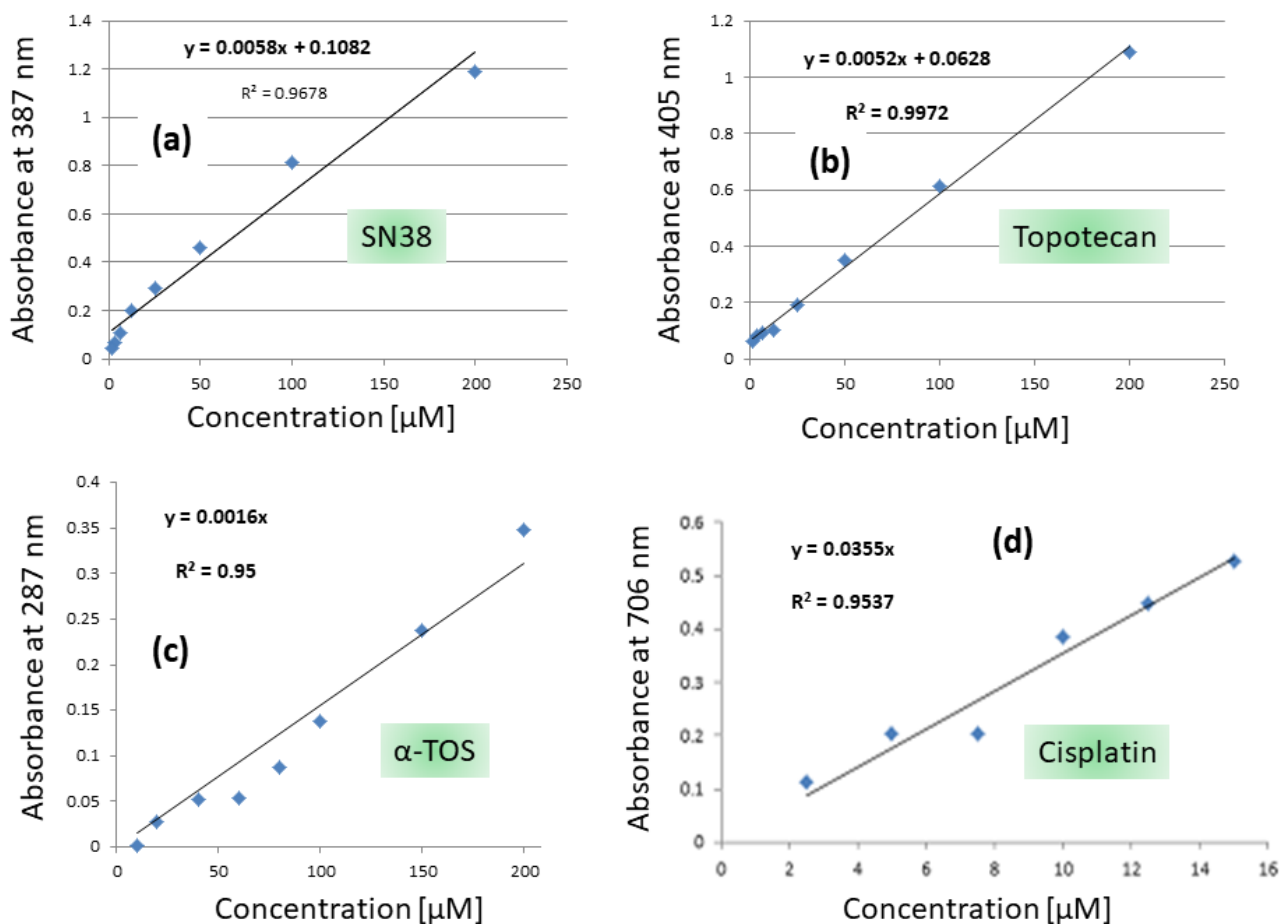

**Figure S1:** Absorbance versus concentration calibration graph of (a) SN38, (b) topotecan, (c)  $\alpha$ -TOS and (d) cisplatin from UV-Vis spectroscopy at characteristic wave lengths.

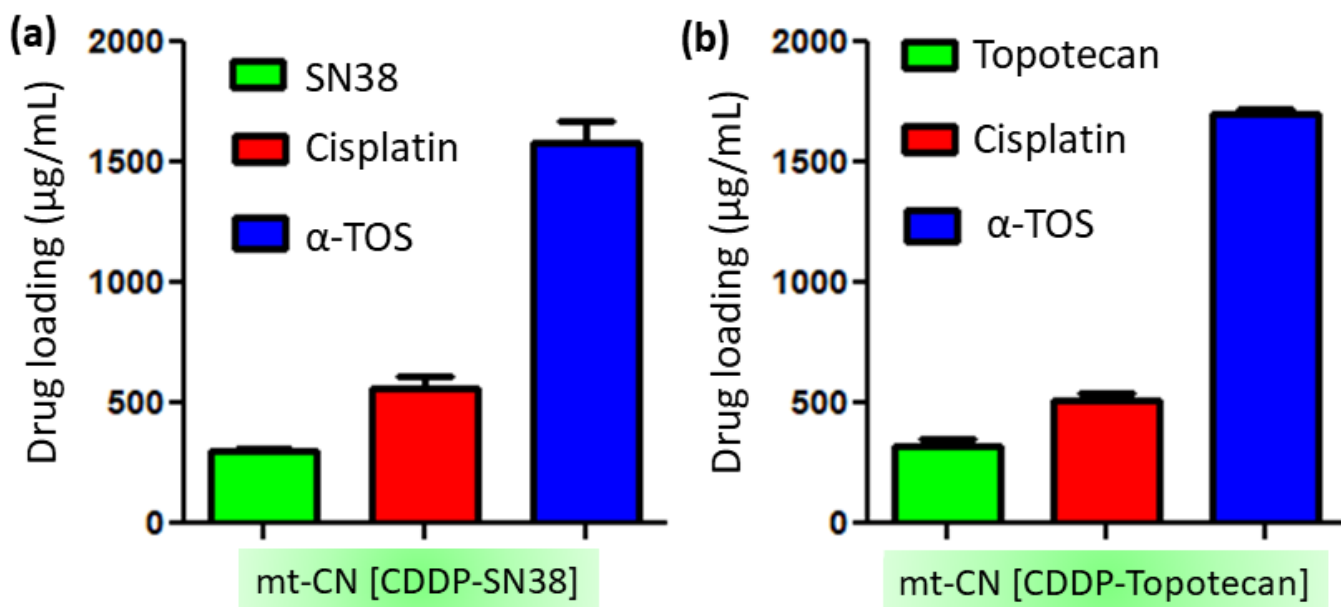

**Figure S2:** (a) Loading of SN38, cisplatin and  $\alpha$ -TOS in mt-CN [CDDP-SN38] and (b) loading of topotecan, cisplatin and  $\alpha$ -TOS in mt-CN [CDDP-Topotecan] from UV-Vis spectroscopy.

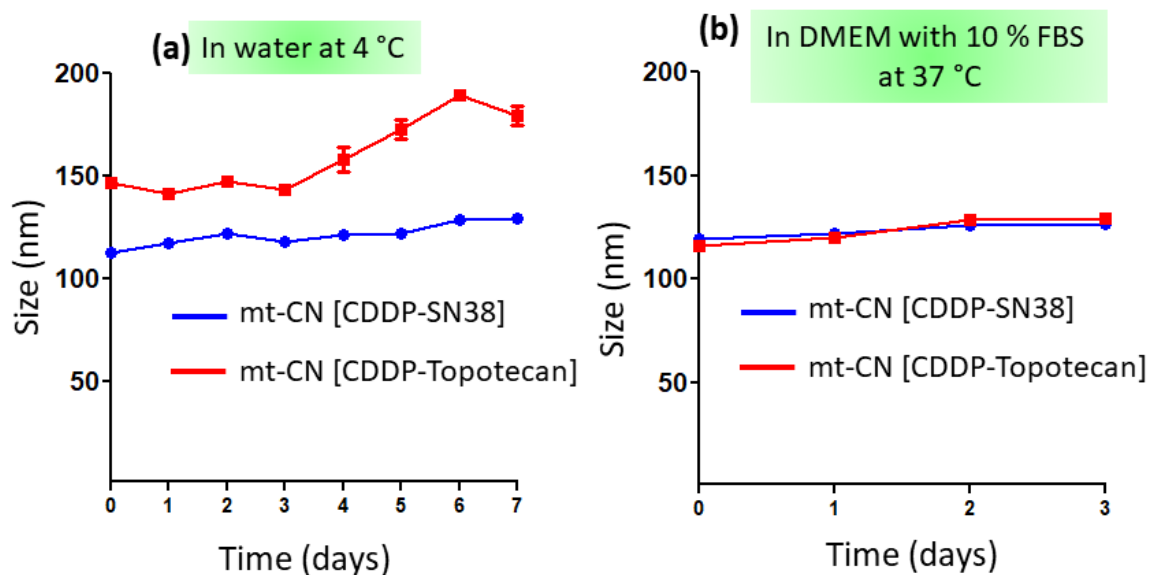

**Figure S3:** Stability of mt-CN in (a) water at 4°C for 7 days and (b) in DMEM cell culture media with 10% FBS at 37°C for 3 days.

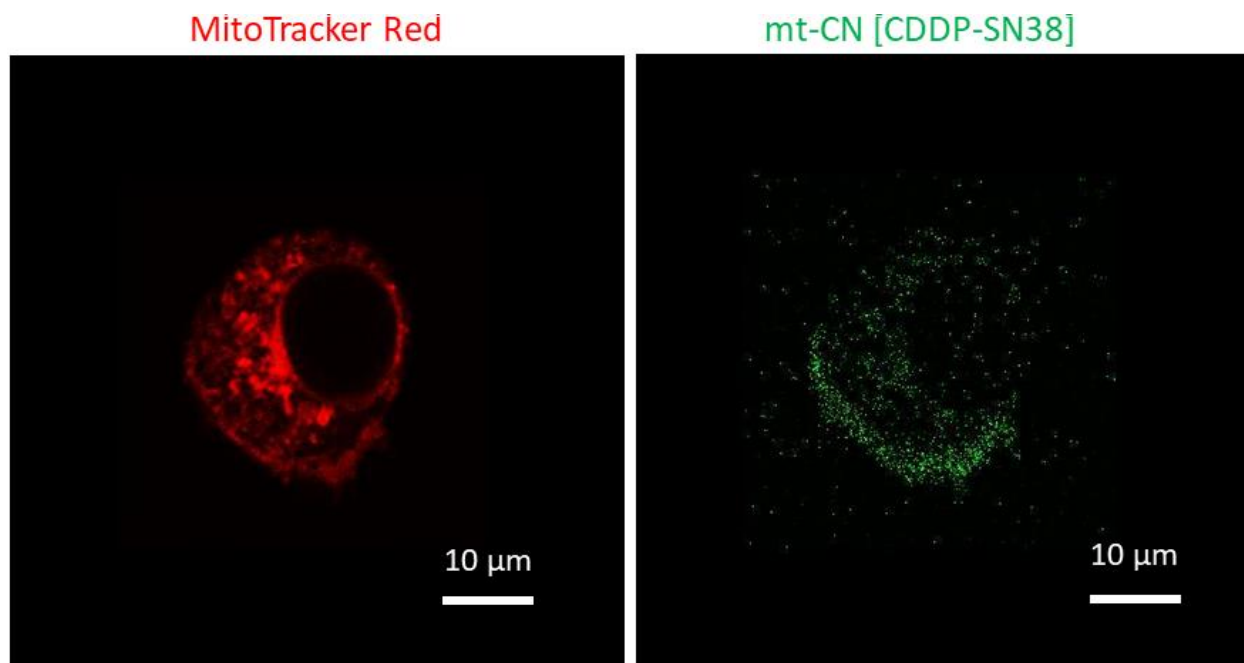

**Figure S4:** 3D-Z-stack confocal laser scanning microscopy (CLSM) images of MCF7 cells treated with green fluorescence mt-CN [CDDP-SN38] for 12 h showing that the nanoparticle internalized into the cells. Each slice is having 0.34 μm Z resolution.

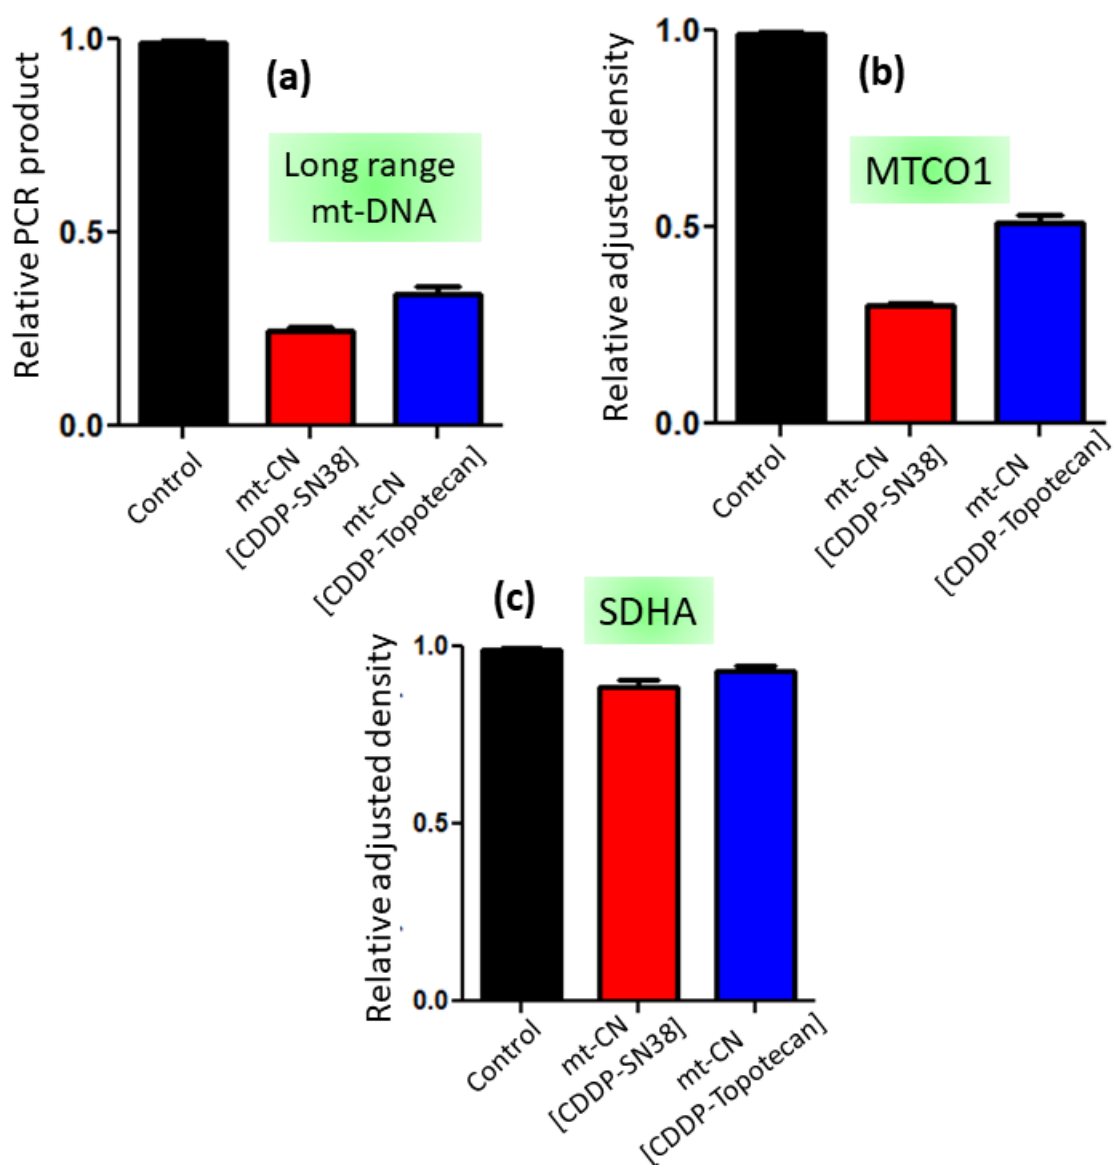

**Figure S5:** Quantification of (a) long-range mt-DNA fragments from PCR assay, (b) expression of MTCO-1 (c) expression of SDHA after treating MCF7 cells with mt-CN for 24 h.

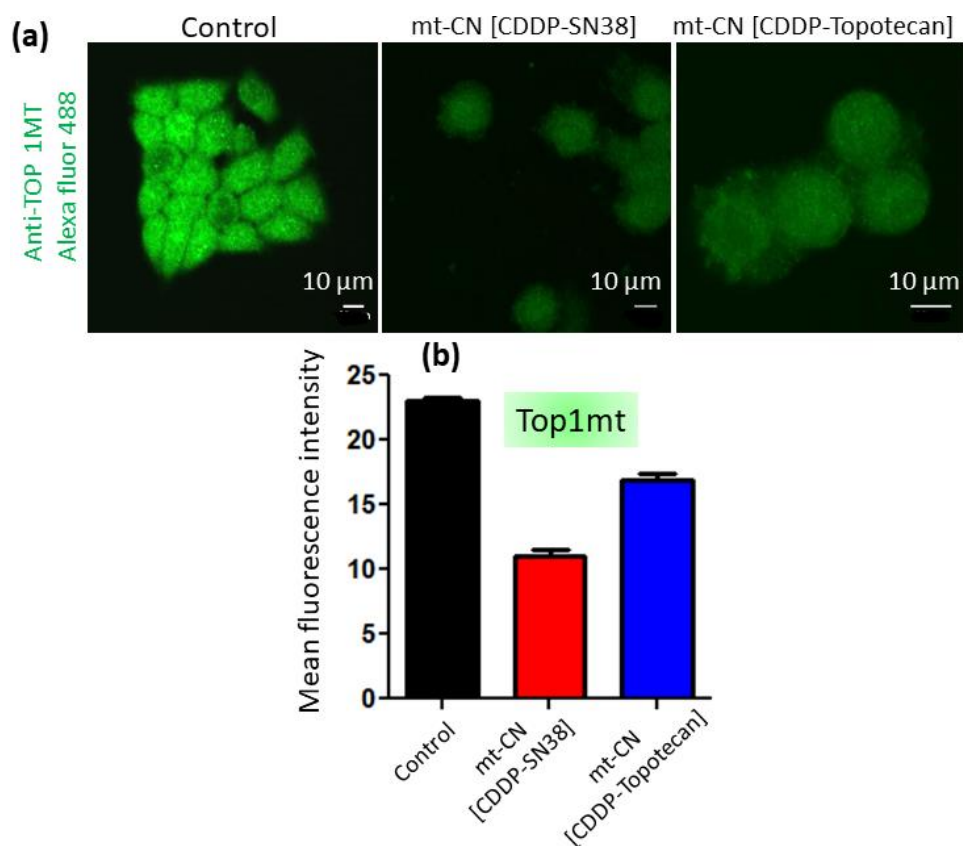

**Figure S6:** (a) CLSM images of mitochondrial Topoisomerase I in MCF7 cells after treatment with mt-CN for 24 h followed by staining with Anti-Top1MT-Alexa Fluor 488 antibody (green fluorescent). Scale = 10  $\mu$ m. (b) expression of Top1mt from Western blot analysis after treating MCF7 cells with mt-CN for 24 h.

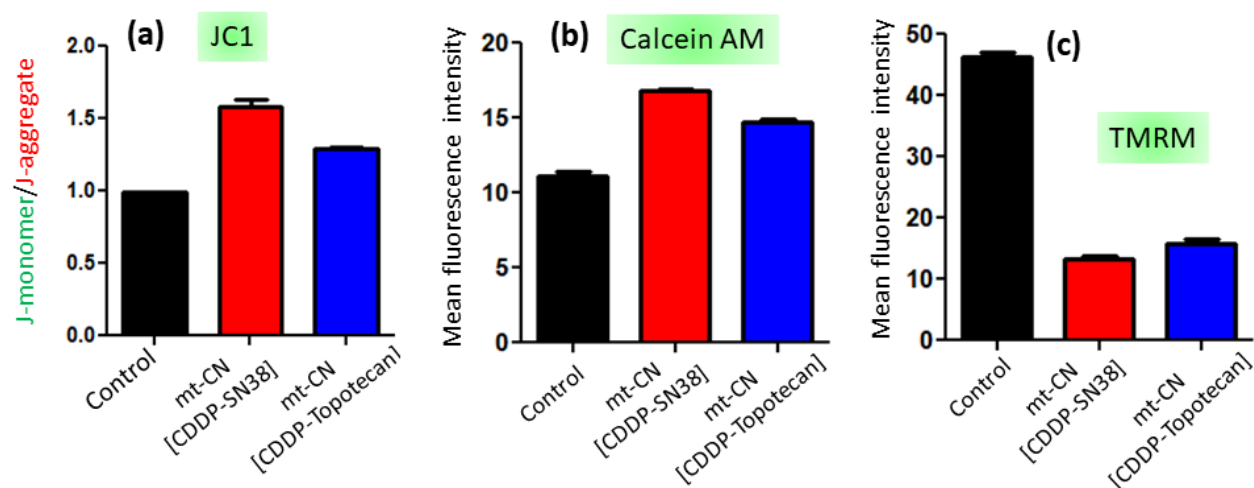

**Figure S7:** Confocal laser scanning microscopy based quantification of (a) J-monomer/J-aggregate in JC1 assay, (b) mean fluorescence intensity of Calcein AM and (c) mean fluorescence intensity of TMRM from MCF7 cells after treatment with mt-CN for 24 h

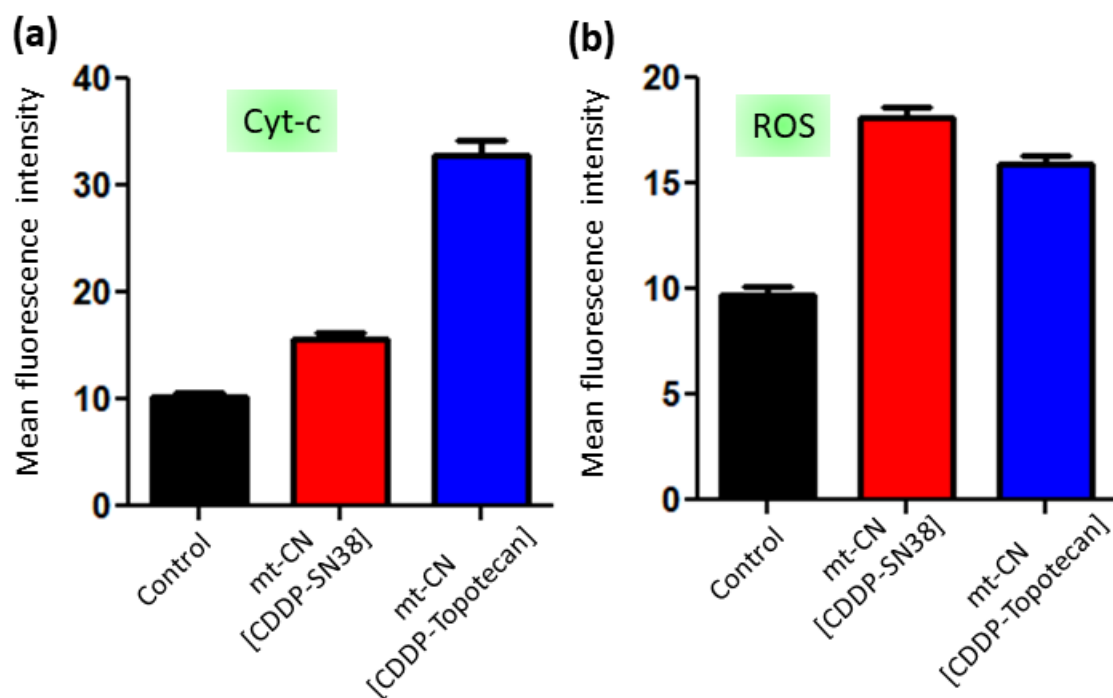

**Figure S8:** Quantification of mean fluorescence intensity from confocal microscopy of (a) cytochrome c and (b) reactive oxygen species (ROS) in MCF7 cells after treatment with mt-CN for 24 h.

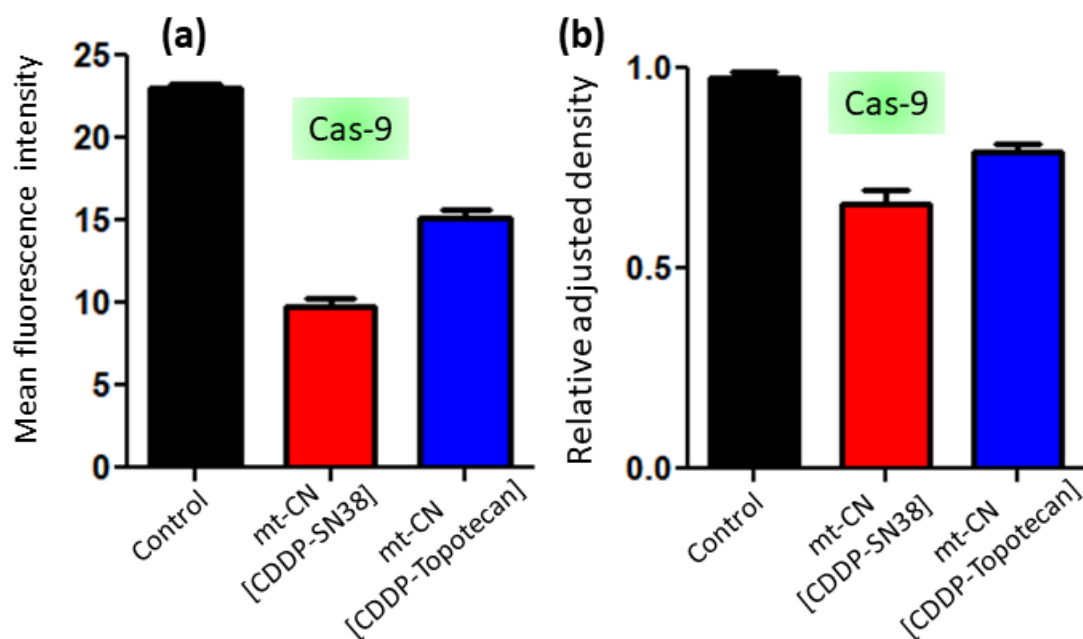

**Figure S9:** Quantification of (a) mean fluorescence intensity of caspase-9 from confocal microscopy and (b) expression of caspase-9 from gel electrophoresis in MCF7 cells after treatment with mt-CN for 24 h.

**Table S1:** Quantification of co-localization of mt-CNs into mitochondrial determined from confocal laser scanning microscopy.

|                                   |                                    | mt-CN [CDDP-SN38]   | mt-CN [CDDP-Topo]      |
|-----------------------------------|------------------------------------|---------------------|------------------------|
| Image Channels                    |                                    | C1 (green) C2 (red) | C1 (green)<br>C2 (red) |
| Pearsons' Correlation Coefficient | r                                  | 0.8                 | 0.6                    |
| Manders Coefficients              | M1 (fraction of C2 overlapping C3) | 0.9                 | 0.9                    |
|                                   | M2 (fraction of C3 overlapping C2) | 0.9                 | 1.0                    |
| Percent volume colocalization     |                                    | <b>67.7%</b>        | <b>55.3%</b>           |
